# Supplementary material for: Droplet-based high-throughput single microbe RNA sequencing by smRandom-seq
Source: Springer Nature journal article supplement (doi:10.1038/s41467-023-40137-9), 2023-08-23
Supplement: MOESM1 [file 41467_2023_40137_MOESM1_ESM.pdf]

## Supplementary Information

### Droplet-based high-throughput single microbe RNA sequencing by smRandom-seq

Ziye Xu<sup>1,2#</sup>, Yuting Wang<sup>2,3#</sup>, Kuanwei Sheng<sup>4,5#\*</sup>, Raoul Rosenthal<sup>6</sup>, Nan Liu<sup>2</sup>, Xiaoting Hua<sup>7</sup>, Tianyu Zhang<sup>2</sup>, Jiaye Chen<sup>8</sup>, Mengdi Song<sup>2</sup>, Yuexiao Lv<sup>2</sup>, Shunji Zhang<sup>3</sup>, Yingjuan Huang<sup>2</sup>, Zhaolun Wang<sup>2</sup>, Ting Cao<sup>1,4,6</sup>, Yifei Shen<sup>1</sup>, Yan Jiang<sup>7</sup>, Yunsong Yu<sup>7</sup>, Yu Chen<sup>1</sup>, Guoji Guo<sup>2</sup>, Peng Yin<sup>4,5\*</sup>, David A. Weitz<sup>4,6\*</sup>, Yongcheng Wang<sup>1,2,3,4\*</sup>

<sup>1</sup>Department of Laboratory Medicine, the First Affiliated Hospital, Zhejiang University School of Medicine, Hangzhou, China

<sup>2</sup>Liangzhu Laboratory, Zhejiang University, Hangzhou, China

<sup>3</sup>College of Biomedical Engineering and Instrument Science, Zhejiang University, Hangzhou, China

<sup>4</sup>Wyss Institute for Biologically Inspired Engineering, Harvard University, Boston, United States

<sup>5</sup>Department of Systems Biology, Harvard Medical School, Boston, United States

<sup>6</sup>John A. Paulson School of Engineering and Applied Sciences and Department of Physics, Harvard University, Cambridge, United States

<sup>7</sup>Department of Infectious Diseases, Sir Run Run Shaw Hospital, Zhejiang University School of Medicine, Hangzhou, China

<sup>8</sup>Department of Biomedical Informatics, Harvard Medical School, Boston, United States

#These authors contributed equally to this work

\*Corresponding Author: Yongcheng Wang ([yongcheng@zju.edu.cn](mailto:yongcheng@zju.edu.cn)), David A. Weitz ([weitz@seas.harvard.edu](mailto:weitz@seas.harvard.edu)), Peng Yin ([Peng\\_Yin@hms.harvard.edu](mailto:Peng_Yin@hms.harvard.edu)), and Kuanwei Sheng ([Kuanwei.Sheng@wyss.harvard.edu](mailto:Kuanwei.Sheng@wyss.harvard.edu))

## Supplementary Figures

### Supplementary Figure 1

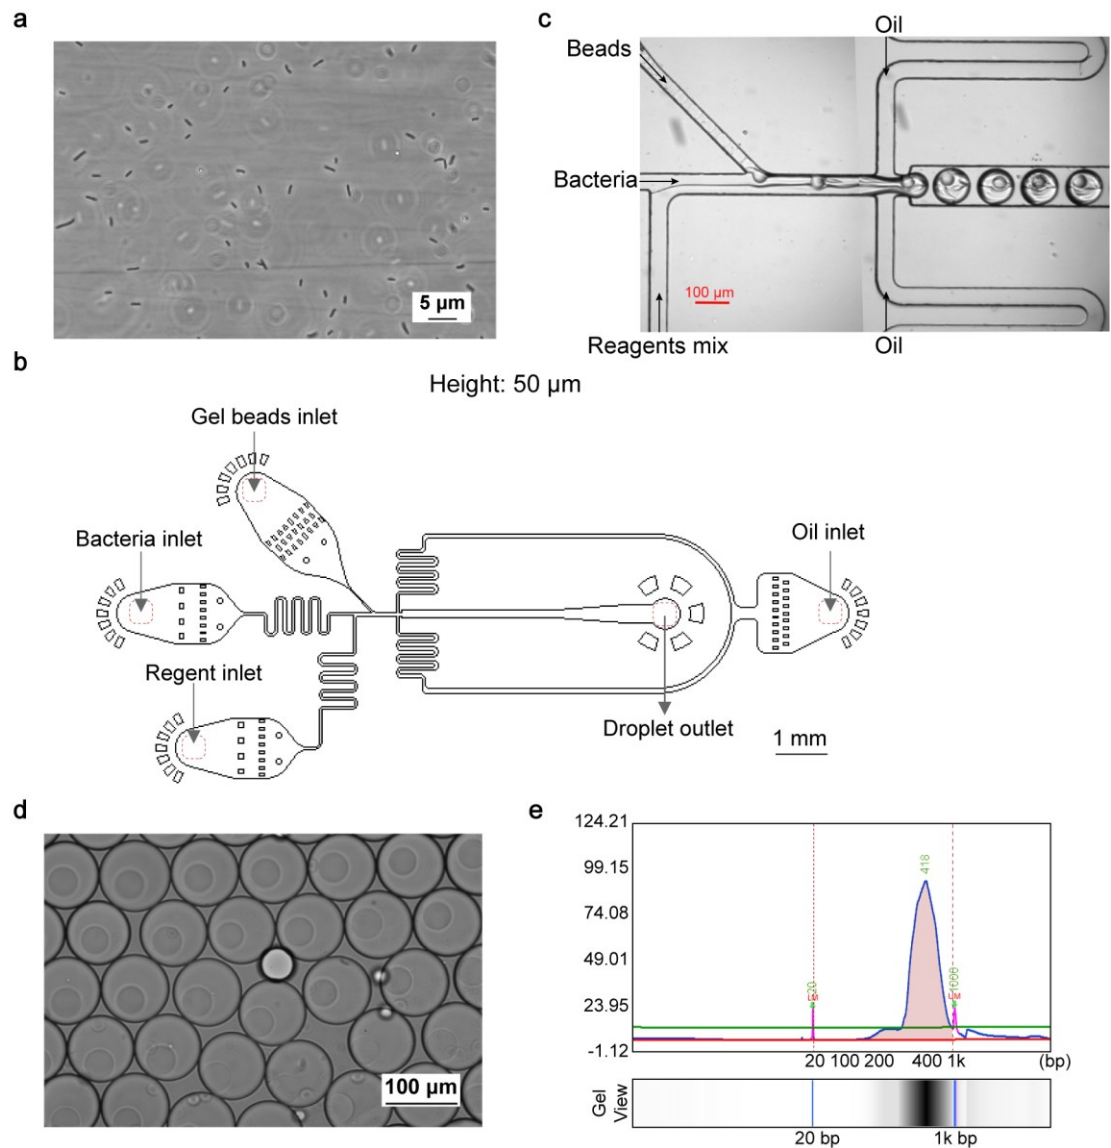

**Supplementary Figure 1. The microfluidic platform of smRandom-seq.**

**a**, Image of fixed *E. coli* after reverse transcription and dA tailing. Scale bar: 5  $\mu\text{m}$ .  $n = 4$  independent experiments. **b**, Design of the device for cell, bead and mix reagents encapsulation. Height: 50  $\mu\text{m}$ . **c**, Image of microfluidic barcoding device. Scale bar: 100  $\mu\text{m}$ . **d**, Image of encapsulated droplets. Scale bar: 100  $\mu\text{m}$ . **e**, Electropherogram of amplicon from barcoded single bacterium cDNAs. Lower marker: 20 bp; upper marker: 1k bp.

Supplementary Figure 2

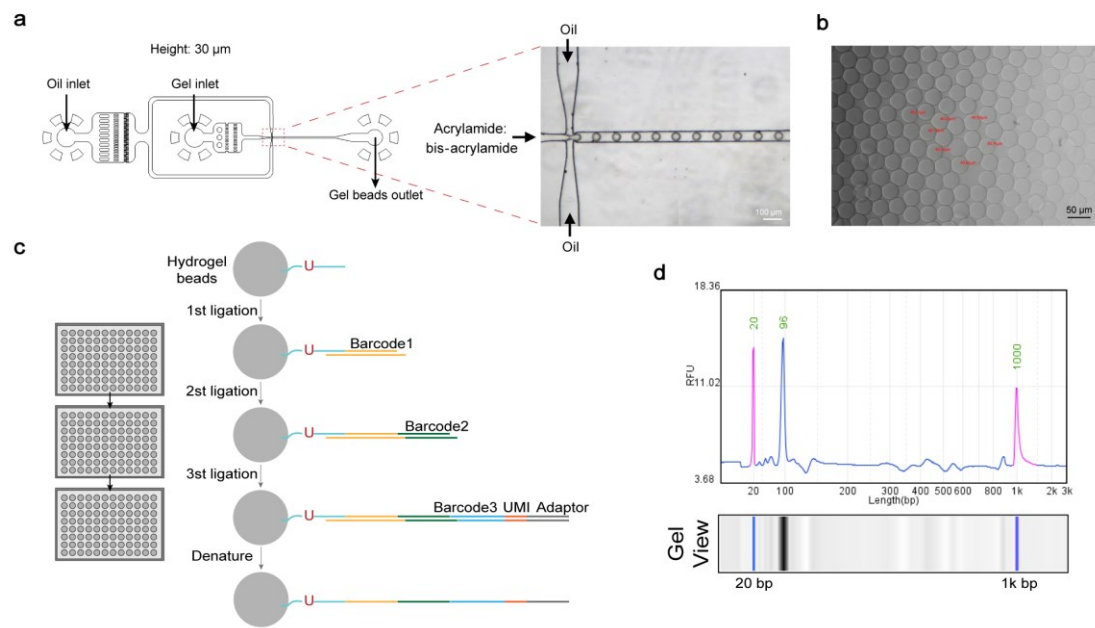

**Supplementary Figure 2. Synthesis and quality control of barcoded hydrogel bead.**

**a**, Design of the device for hydrogel beads generation. Height: 30  $\mu\text{m}$ . Hydrogel bead generation and collection. Scale bar: 100  $\mu\text{m}$ . **b**, Image of hydrogel beads. Scale bar: 50  $\mu\text{m}$ . **c**, Barcode beads fabrication procedures. U: uracil residue; UMI, unique molecular identifier. **d**, Electropherogram of released DNA primers after enzymic digestion from barcode beads. Peaks at 20 and 1000 base pairs are gel migration markers.

Supplementary Figure 3

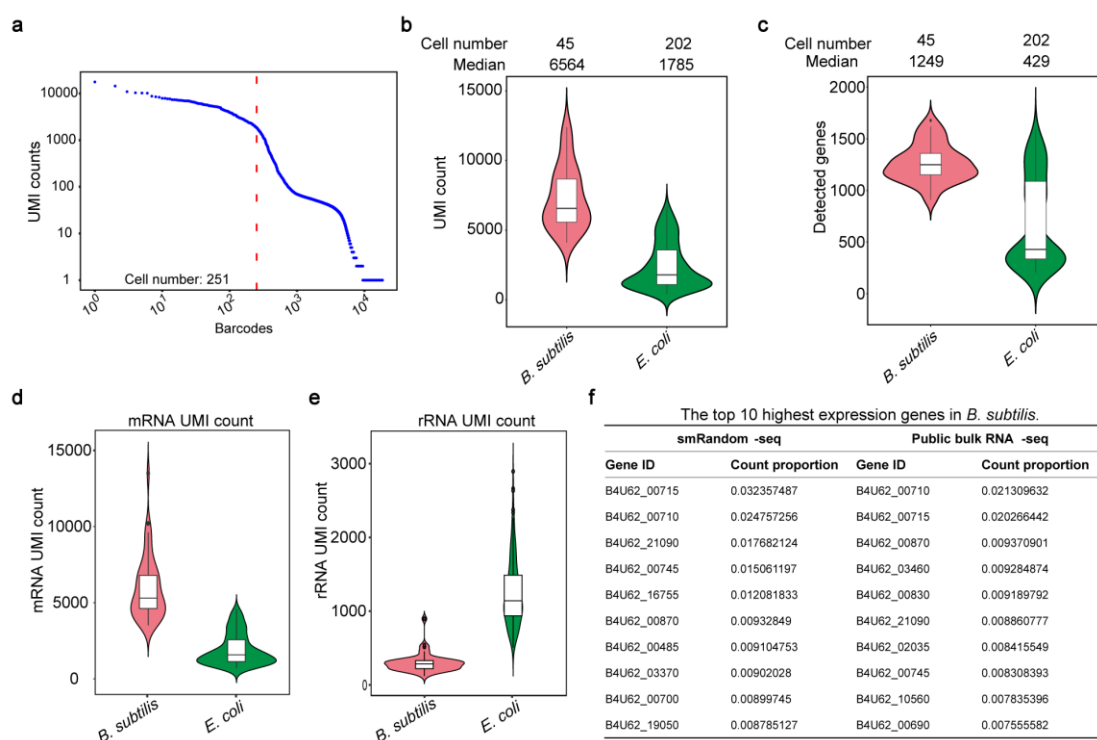

**Supplementary Figure 3. Performance of the smRandom-seq on reference bacteria samples.**

**a**, UMI count versus barcode rank plot of the *E. coli* and *B. subtilis* mixture. The knee point (red dashed line) indicates the threshold for *E. coli* and *B. subtilis* mixture (Cell number: 251). **b**, **c**, Distribution of UMI counts (**b**) and detected genes (**c**) from *B. subtilis* and *E. coli* in the mixture of *B. subtilis* and *E. coli* sample by smRandom-seq without rRNA depletion. *B. subtilis* n= 45 cells, *E. coli* n= 202 cells. **d**, **e**, Distribution of mRNA UMI counts (**d**) and rRNA UMI (**e**) counts detected from *B. subtilis* and *E. coli* in the mixture of *B. subtilis* and *E. coli* sample by smRandom-seq without rRNA depletion. *B. subtilis* n= 45 cells, *E. coli* n= 202 cells. **f**, The top 10 highest expression genes sorted by the count proportion in *B. subtilis* datasets of the species mixture by smRandom-seq and the public bulk RNA-seq dataset of the Emp3h\_i Exponential growth sample<sup>1</sup>. Data in the box plot in **Supplementary Fig. 3b-e** corresponded to the first quartiles (lower hinges), median (center), and third quartiles (upper hinges). Whisker is defined as 1.5\* IQR (interquartile range) from the hinge.

Supplementary Figure 4

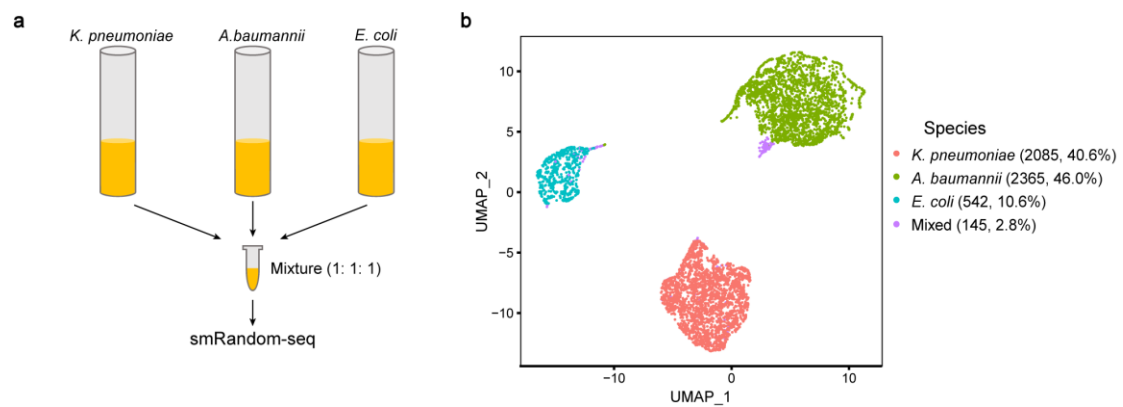

**Supplementary Figure 4. Three-species-mixing experiment.**

**a**, Experimental design for three-species mixture including *A.baumannii*, *K. pneumoniae*, and *E. coli* by smRandom-seq. **b**, UMAP plot colored by species, *A.baumannii*, *K. pneumoniae*, *E. coli* and mixed cells, identified from the three-species mixture.

Supplementary Figure 5

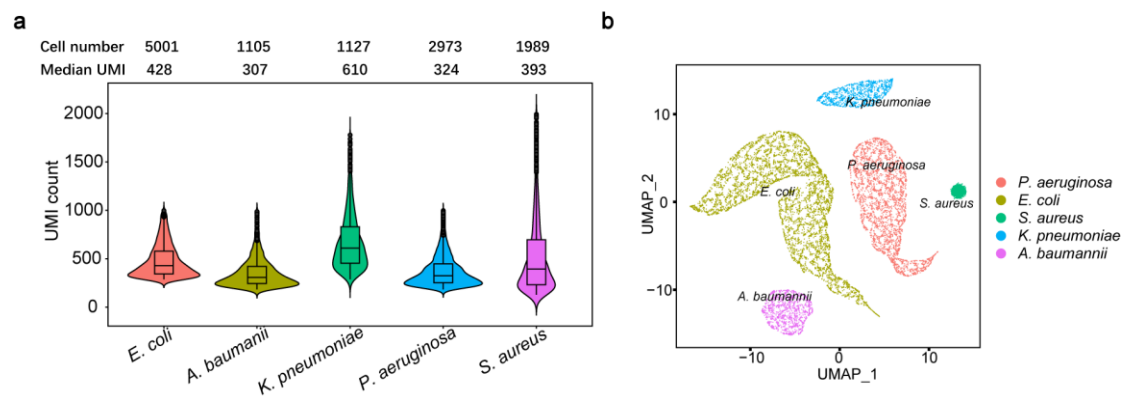

**Supplementary Figure 5. Single-species experiments.**

**a**, Distribution of UMI count of different bacterial species datasets by smRandom-seq, including *E. coli*, *A. baumannii*, *K. pneumoniae*, *P. aeruginosa*, and *S. aureus*. The cell numbers of these bacterial species datasets by smRandom-seq were as follows: 5001 *E. coli*, 1105 *A. baumannii*, 1127 *K. pneumoniae*, 2973 *P. aeruginosa*, and 1989 *S. aureus*. Data in the box plot in **Supplementary Fig. 5a** corresponded to the first quartiles (lower hinges), median (center), and third quartiles (upper hinges). Whisker is defined as  $1.5 \times \text{IQR}$  (interquartile range) from the hinge.

**b**, UMAP plot colored by species, *E. coli*, *A. baumannii*, *K. pneumoniae*, *P. aeruginosa*, and *S. aureus*, identified from single-species experiments. Source data are provided as a Source Data file.

Supplementary Figure 6

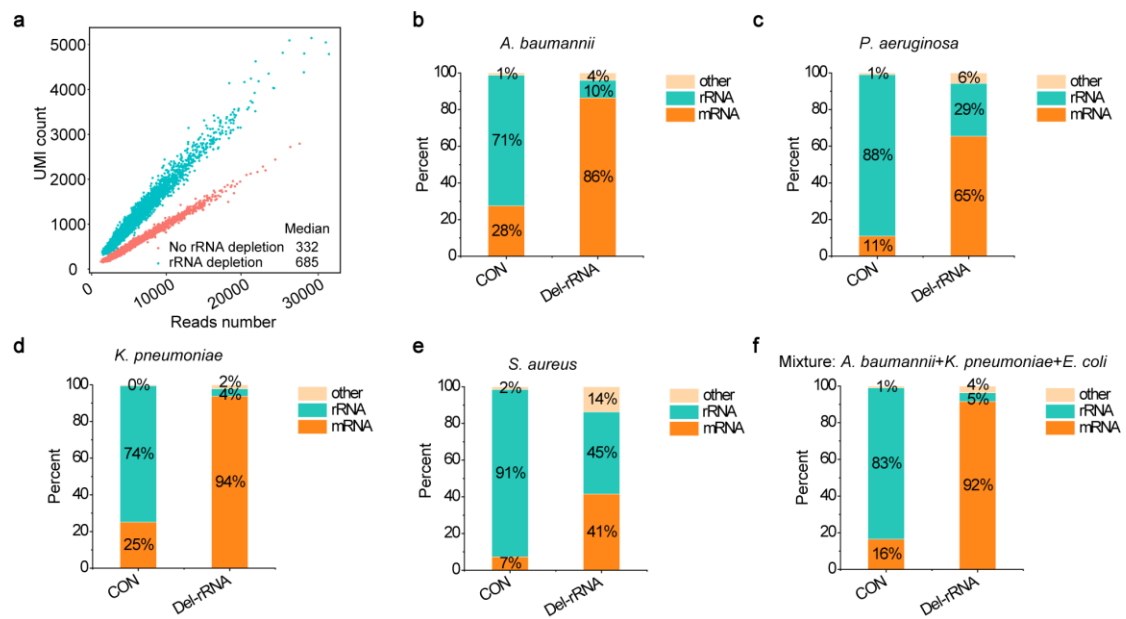

**Supplementary Figure 6. Case9-based rRNA depletion experiments.**

**a**, Scatter plot showing UMI count and the number of reads per barcode of *E. coli* samples with (blue) and without (red) rRNA depletion. Each dot corresponds to a putative cell. **b-f**, Representative proportions of transcript categories of single bacterial species, including *A. baumannii* (**b**), *K. pneumoniae* (**c**), *P. aeruginosa* (**d**), and *S. aureus* (**e**), and a mixture of *A. baumannii*, *K. pneumoniae*, and *E. coli* (**f**) with (Del-rRNA) and without rRNA depletion (CON). other, all other RNA classes. Source data are provided as a Source Data file.

Supplementary Figure 7

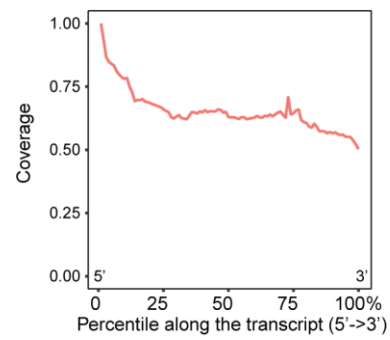

**Supplementary Figure 7. Average percentile coverage across all transcripts (5'→3').** Source data are provided as a Source Data file.



Supplementary Figure 8

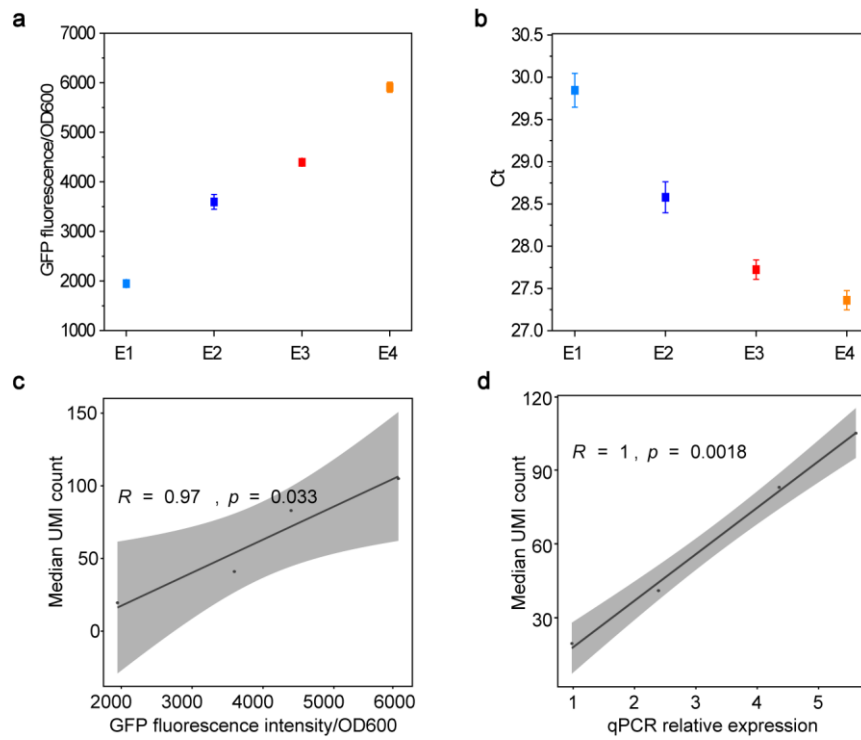

**Supplementary Figure 8. Quantitativeness of gene expression in smRandom-seq by GFP expression model.**

**a, b** GFP fluorescence/OD600 values (**a**) ( $n=6$ ) and Ct values from qPCR ( $n=3$ ) (**b**) of *E. coli* samples with different GFP expression induced by different amount of propionate (0, 6.25, 25, and 100 mM). Data in **a, b** were expressed as mean  $\pm$  SEM. **c**, Comparison of GFP fluorescence values and the median number of UMIs. **d**, Comparison qPCR relative expression and the median number of UMIs. Relative quantification in qPCR is calculated by comparing the expression levels of GFP in other groups (E2, E3 and E4) against the expression levels of GFP in control (E1).  $R$  presents Pearson correlation coefficient. The shaded area represents the 95% confidence interval.  $p$ -value is the significance level of the  $t$  test and calculated alongside the Pearson coefficient as implemented in the R package ggscatter. Source data are provided as a Source Data file.

Supplementary Figure 9

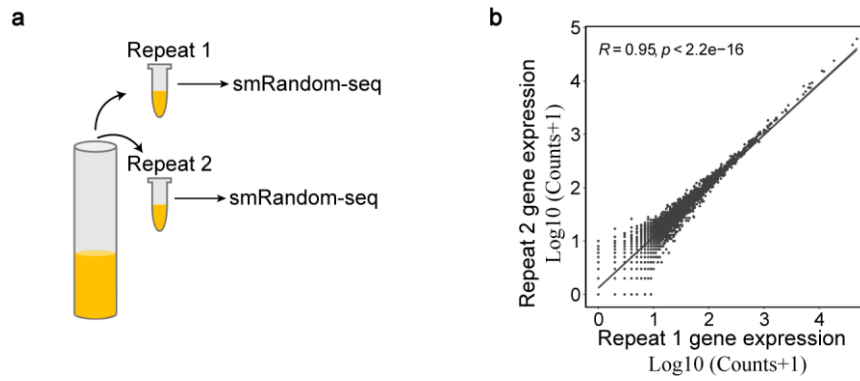

**Supplementary Figure 9. Evaluation the technical reproducibility of smRandom-seq.**

**a**, Experimental design for technical reproducibility evaluation. **b**, Scatter plot showing correlation of gene expression ( $\text{Log}_{10}(\text{Counts}+1)$ ) for two repeated *E. coli* samples (Repeat 1 and Repeat 2) applied with smRandom-seq separately.  $R$  presents Pearson correlation coefficient.  $p$ -value is the significance level of the  $t$  test and calculated alongside the Pearson coefficient as implemented in the R package ggscatter. Source data are provided as a Source Data file.

Supplementary Figure 10

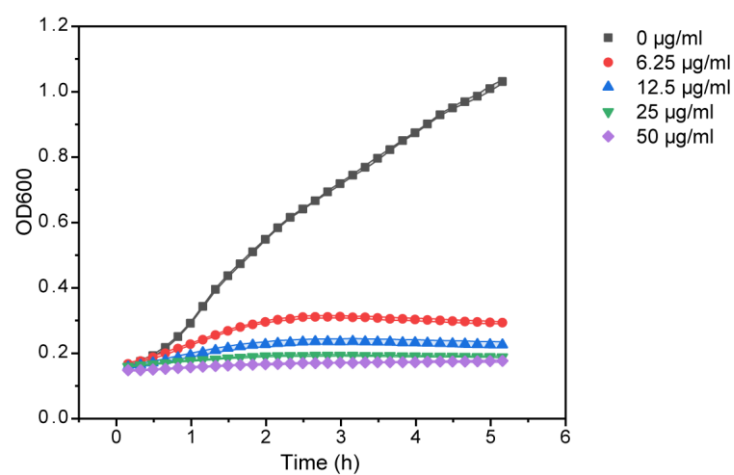

**Supplementary Figure 10. Growth curves (OD 600) of *E. coli* upon 0, 6.25, 12.5, 25, and 50 µg/mL CIP.** CIP: ciprofloxacin. Source data are provided as a Source Data file.

Supplementary Figure 11

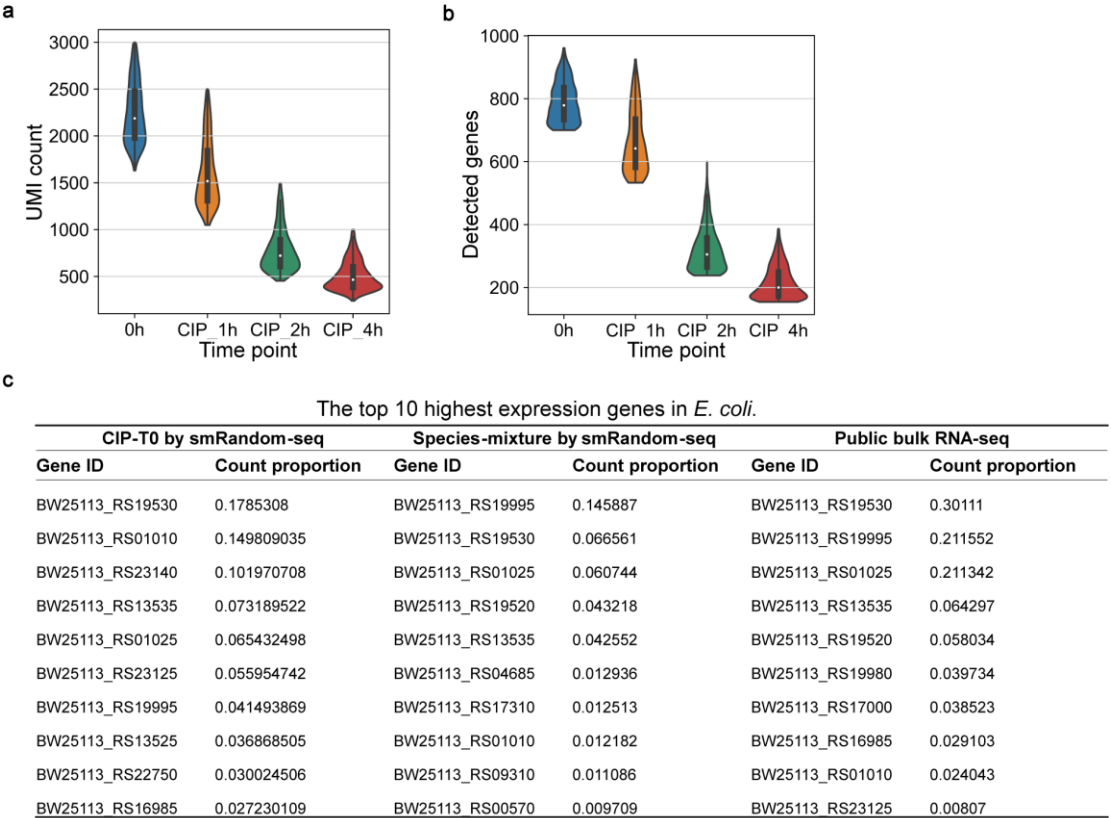

**Supplementary Figure 11. Gene expression of CIP-treated *E. coli* samples.**

**a, b**, Violin plots of the distribution of UMI count (**a**) and detected genes (**b**) of CIP-treated *E. coli* samples. 0h n= 771 cells, CIP 1h n= 850 cells, CIP 2h n= 950 cells, CIP 4h n= 949 cells. Data in the violin plot in **Supplementary fig. 11a, b** corresponded to the median of the distribution (white dot in the center), the interquartile range of the data (the thicker black bar), and the data that extends to 1.5 times the interquartile range (the thinner black bar). **c**, The top 10 highest expression genes sorted by the count proportion in *E. coli* datasets of the CIP-T0 sample, the species mixture by smRandom-seq and the public bulk RNA-seq dataset of the BW25113 Wild Type\_ECWT1\_1 sample<sup>2</sup>.

Supplementary Figure 12

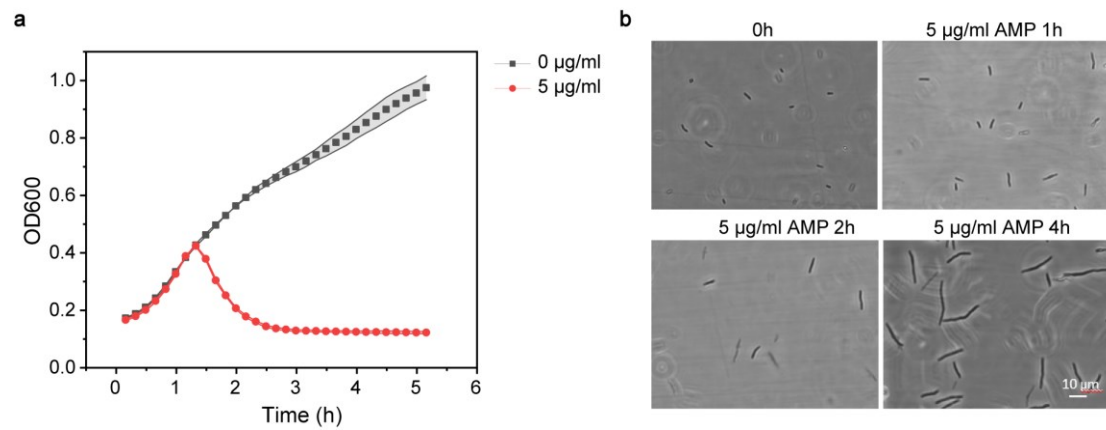

**Supplementary Figure 12. Growth curves and morphology of *E. coli* upon AMP.**

**a**, OD600 curves of *E. coli* exposure to 0 and 5 µg/mL AMP. Source data are provided as a Source Data file. **b**, Image of *E. coli* samples treated with 5 µg/mL AMP after 0, 1, 2, and 4 hours. Scale bar: 10 µm. n= 4 independent experiments.

Supplementary Figure 13

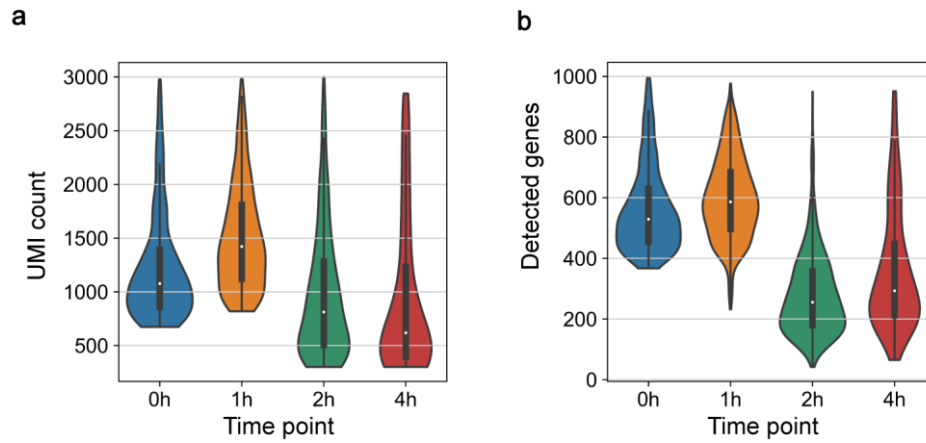

**Supplementary Figure 13. UMI count (a) and detected genes (b) of AMP-treated *E. coli* samples.** 0h n= 831 cells, AMP 1h n= 1094 cells, AMP 2h n= 716 cells, AMP 4h n= 216 cells. Data in the violin plot in **Supplementary fig. 13a, b** corresponded to the median of the distribution (white dot in the center), the interquartile range of the data (the thicker black bar), and the data that extends to 1.5 times the interquartile range (the thinner black bar).

Supplementary Figure 14

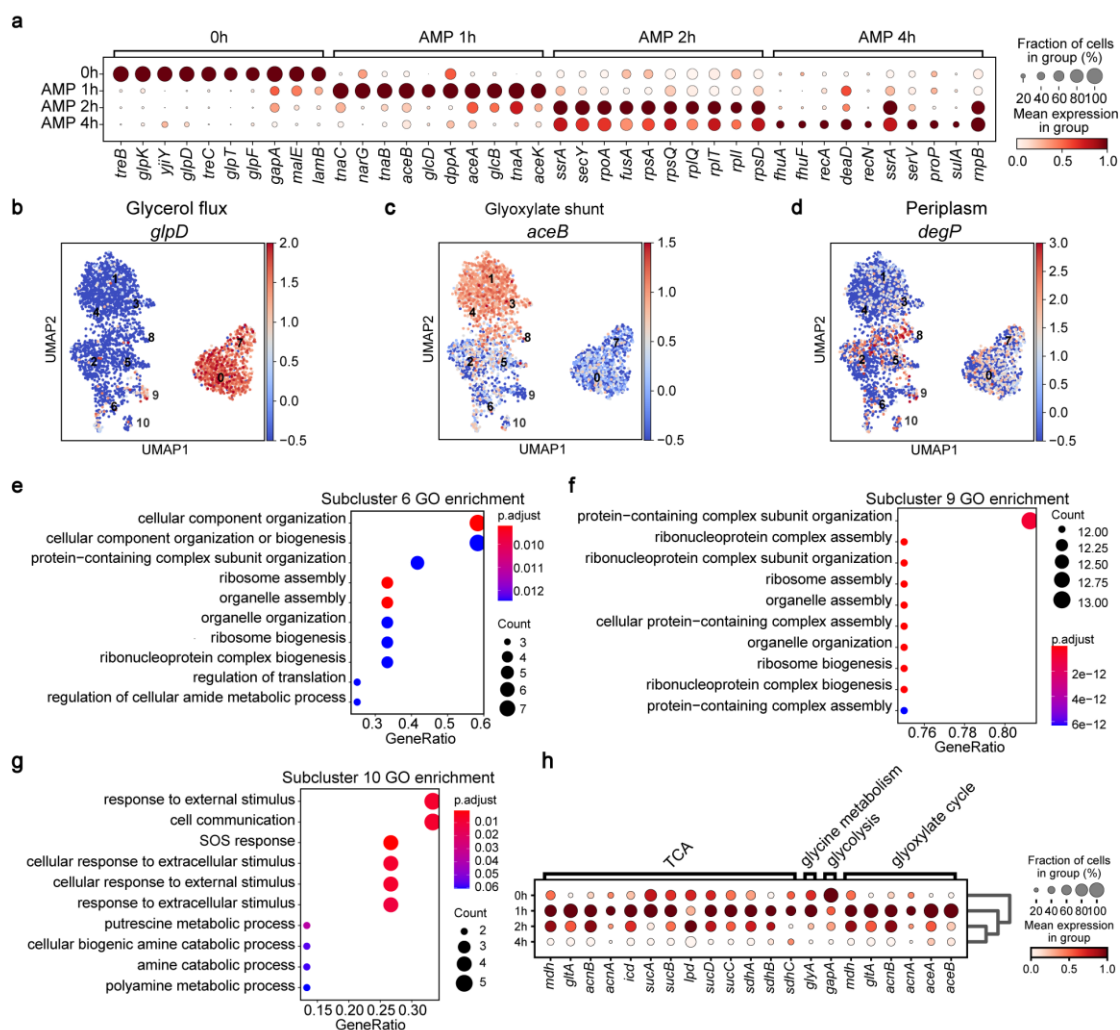

**Supplementary Figure 14. Gene expression patterns of *E. coli* upon 12.5 µg/mL AMP.**

**a**, Top 10 DEGs among groups of *E. coli* samples upon 12.5 µg/mL AMP. **b**, Expression of glycerol flux related marker genes of subclusters 0 and 7 (*glpD*) on the t-SNE plot. **c**, Expression of glyoxylates shunt related marker genes of subclusters 1, 3 and 4 (*aceB*) on the t-SNE plot. **d**, Expression of periplasm related marker genes of subclusters 8 (*degP*) on the t-SNE plot. **e-g**, Bubble plots of GO enrichment analysis of top 20 DEGs in subclusters 6 (**e**), 9 (**f**) and 10 (**g**) of *E. coli* samples upon high concentration of AMP. The cutoff value of p-value of GO enrichment was 0.05 and the cutoff value of q-value of GO enrichment was 0.05. **h**, Expression of genes involved in different metabolic pathways in different groups. TCA: tricarboxylic acid cycle. Source data are provided as a Source Data file.

Supplementary Figure 15

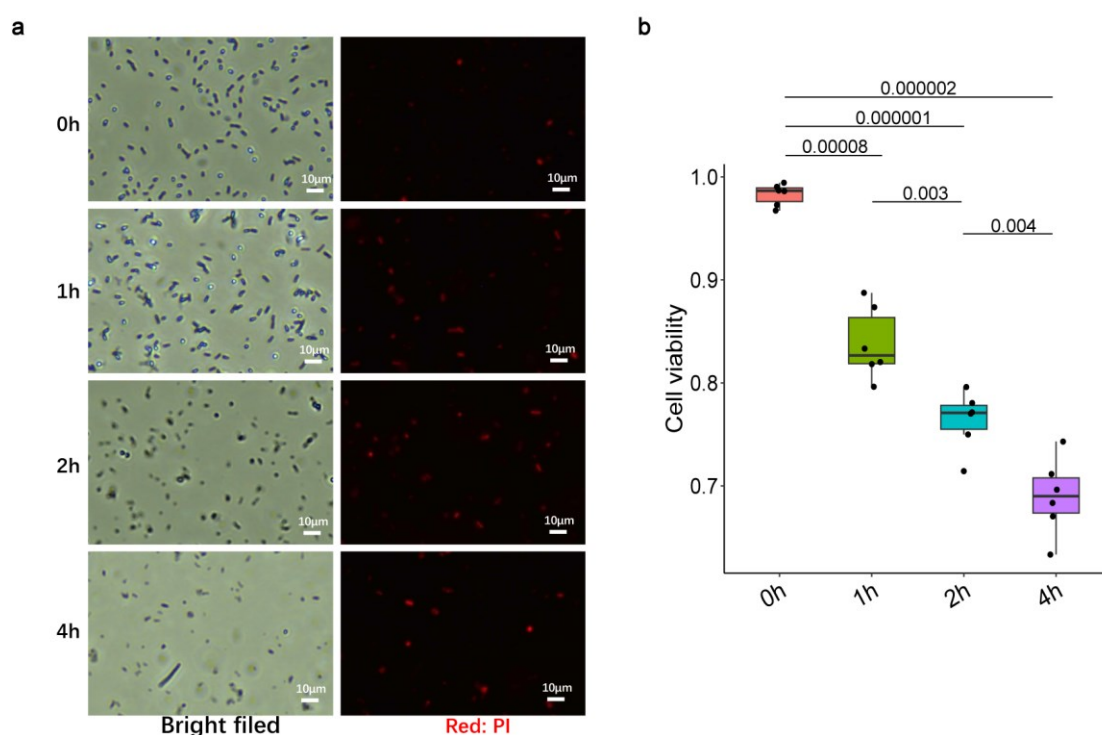

**Supplementary Figure 15. Cell viability analysis of *E. coli* upon 12.5 µg/mL AMP.**

**a**, Cell viability analysis by combined propidium iodide (PI) staining. Representative fluorescence and bright filed images of *E. coli* samples at 0h, 1h, 2h, 4h time point after 12.5 µg/mL AMP treatment. Red color (PI) showed positive staining of dead cells. Scale bar showed 10 µm. n= 4 independent experiments. **b**, Graphic representation of statistical result of cell viability. n= 6 biologically independent samples. Data in the box plot corresponded to the first quartiles (lower hinges), median (center), and third quartiles (upper hinges). Whisker is defined as 1.5\* IQR (interquartile range) from the hinge. Two-tailed Student's *t* test were used for calculation of *p* values. Statistical significance was established at 95% confidence level (*p* values < 0.05). Source data are provided as a Source Data file.



Supplementary Figure 16

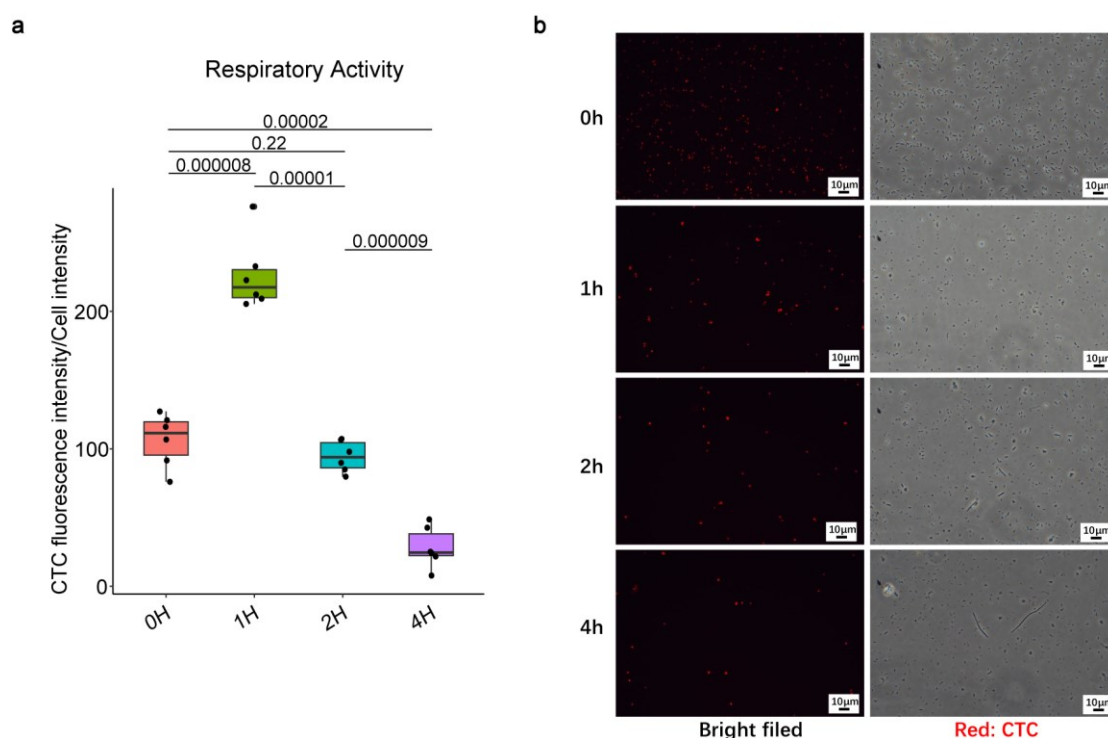

**Supplementary Figure 16. Cell respiratory activity analysis of *E. coli* upon 12.5  $\mu\text{g/mL}$  AMP.**

**a**, Cell respiratory activity analysis by the 5-cyano-2,3-ditolyltetrazolium chloride (CTC) dye staining in combination with fluorescence microplate reader. Graphic representation of statistical result of normalized CTC fluorescence intensity (CTC fluorescence intensity/Cell count) of *E. coli* samples at 0h, 1h, 2h, 4h time point after 12.5  $\mu\text{g/mL}$  AMP treatment.  $n=6$  biologically independent samples. Data in the box plot corresponded to the first quartiles (lower hinges), median (center), and third quartiles (upper hinges). Whisker is defined as  $1.5 \times \text{IQR}$  (interquartile range) from the hinge. Two-tailed Student's *t* test were used for calculation of *p* values. Statistical significance was established at 95% confidence level (*p* values  $< 0.05$ ). **b**, Representative fluorescence and bright filed images of *E. coli* samples at 0h, 1h, 2h, 4h time point after 12.5  $\mu\text{g/mL}$  AMP treatment. Red color (CTC) showed cells with high cell respiratory activity. Scale bar showed 10  $\mu\text{m}$ .  $n=4$  independent experiments. Source data are provided as a Source Data file.

## Supplementary Tables

**Supplementary Table 1: Primers**

| Primer list           | Sequence                                                                                                                                                        |
|-----------------------|-----------------------------------------------------------------------------------------------------------------------------------------------------------------|
| Barcoded beads primer | /5Acryd/ATTATATATAT U GTG AGT GAT GGT TGA GGA TGT GTG GAGATA [10 bases barcode1] TGGT [10 bases barcode2] GAGA [10 bases barcode3] NNNNNNNNTTTTTTTTTTTTTTTTTTTT |
| Random primer         | GGAGTTGGAGTGAGTGGATGAGT GATG NNNNNNN                                                                                                                            |
| PCR-1 primer          | GGAGTTGGAGTGAGTGGATGAGTGATG                                                                                                                                     |
| PCR-2 primer          | GTG AGT GAT GGT TGA GGA TGT GTG GAG ATA                                                                                                                         |

**Supplementary Table 2: Barcode sequences**

|    | Barcode1_sequences | Barcode2_sequences | Barcode3_sequences |
|----|--------------------|--------------------|--------------------|
| 1  | GATGTACATG         | ATAGAAACGA         | GCTTTTCTTG         |
| 2  | TTCAGATTCT         | TCCGTGCAAG         | CTTTAAGCAT         |
| 3  | CGTACTACGC         | AATGGGACAC         | GAAATATTGT         |
| 4  | GCTATTATAG         | TATTAGGCGA         | GGCGGAAACG         |
| 5  | CAGAAGGAAC         | CAATCATCAC         | AATGGGTATG         |
| 6  | AGACTTTTAA         | CAGTTTTACT         | CGGCAATTGA         |
| 7  | GGCAACTGTG         | CTTTCTAGAT         | CTCGAGGAAT         |
| 8  | AAATTCGCGG         | TGTGATACCT         | CCTATTGTCT         |
| 9  | CTTAGACACT         | TGTTAACAAC         | GAGGCTCCTA         |
| 10 | AGCGGACTAT         | TTGCTTTCAG         | ACTCAAGGGA         |
| 11 | GAGACGCTAC         | CAGGAACTAA         | ACATCCTGCT         |
| 12 | GTCATCGTGC         | TCGGGCGGAT         | ATTATGGTAG         |
| 13 | TCATTAACAG         | ACGTATAGTG         | TACCGGATTA         |
| 14 | GCTTCGCTTA         | TACTTAAGGC         | CAATTTGAAC         |
| 15 | CTGGCAAAGA         | CATGCGGGTG         | TTTATAGACC         |
| 16 | TCGCTTGAAG         | TCGCACTCCG         | ATCACTCGGT         |
| 17 | ATGAACTTTG         | GAAACTGAAA         | ACTACTAATA         |
| 18 | CAGAGATACG         | TACAGGCGCA         | CCGGAGGATA         |
| 19 | GGCTGATAAA         | GTTGGCATT          | GACGGGAGGT         |
| 20 | TATTTGTCGC         | GTTTTAGGAA         | TCTGGAATAG         |
| 21 | TTAAGGCAAA         | AGATTGGCGG         | TGGAGGGAGC         |
| 22 | ACAGTATTAT         | GAGCGGGTTT         | GCTTGGCAAC         |
| 23 | TGGATGCTAT         | CGGGAAAGGG         | GAGGAATCCT         |
| 24 | TCGAATTTCG         | TTCTTAGGCG         | AAGTAAACGG         |
| 25 | TACTATGGCG         | AACACAATAA         | TTTTGTGGTG         |
| 26 | TAGCTTAGTG         | TTCCGGCGAG         | TCATTGATTG         |
| 27 | GTCAGGCATG         | TTTGTTTTAT         | CAGTATCATC         |
| 28 | GGTTGGTGGT         | GCAGGTGCAG         | CACATGGTGT         |
| 29 | ACATGTAGCT         | ATAAGGACCT         | GTATAGAGTG         |
| 30 | GCGAACAATG         | TCAGTTATCC         | TCGGGTAATC         |
| 31 | TGTTGCTTGC         | AATGGAATGT         | AATTAAGAGC         |
| 32 | TAACAGCAAT         | TGTAATTGAT         | TCACAGCACA         |
| 33 | GTTTGGACTC         | TCAGTGGGTT         | AATTACCTCT         |
| 34 | CATTATGCTA         | GTGGACGTTG         | TGTTCATAGA         |
| 35 | GAGTAAGTGA         | CTCCTGCAAA         | CACGGTGTAG         |
| 36 | GAGCGGTGTA         | TTCGGATTCC         | GCCGAGGTGT         |
| 37 | CGTAAGTCGA         | AATCGGGTCA         | ATGAGGCTTT         |
| 38 | TGGCACGTTT         | AGTCGCCGAC         | TGATGGCGGA         |
| 39 | GAAATCTTTT         | CATAAGAAGT         | CGCTCCTGGT         |
| 40 | AACAACGCAA         | AGGCAGGAAA         | TCAAGGCCTG         |
| 41 | ATGTTGTGGC         | CTTATCCTTG         | ATTAAAGGCT         |
| 42 | TAACTCATTC         | GGTCGAAGGG         | CGGAAAGAGT         |
| 43 | TCGACTATAT         | CAAGAGGTGA         | ACAATAGGCG         |
| 44 | TATCAGTCTG         | CTACTGGTGG         | TCCGACCGTC         |
| 45 | CTATATGTAG         | TATGTTTCATC        | GAAGATACAA         |
| 46 | TGCAATACGG         | AGGCTTGTTT         | CTAAAGGACG         |
| 47 | AAACTGGTGT         | TCGACAGCAG         | TATAAAGGAA         |
| 48 | AATTAGGCGT         | GTAAATGGGA         | ACAGGAGTGA         |
| 49 | ACTGTTTCAGG        | CGGTAATACG         |                    |
| 50 | CAGTATTGTT         | CATTAGTAAA         |                    |
| 51 | GTACTATAGT         | TTAAAGGTTC         |                    |
| 52 | ACAGACATTT         | TAGAAATGGT         |                    |
| 53 | GTCTTTGGAT         | CAACAATGGG         |                    |
| 54 | CTTGATCTAT         | AAATATCGAA         |                    |

|    |            |            |  |
|----|------------|------------|--|
| 55 | GTATGTCAGG | GCCTGGTAGT |  |
| 56 | TATTCAACTG | AAAGACTCTT |  |
| 57 | TTTTGACGGA | TTAACACTTA |  |
| 58 | ATGGTAGAAA | GTAAAGGCTA |  |
| 59 | GTGCTCTATC | GTCACAGGTT |  |
| 60 | GTTATAGTTG | TTTGAAAGTG |  |
| 61 | AGGATCTTAC | GATTGGGTGC |  |
| 62 | TGCATTTGAA | TAAAGGATGT |  |
| 63 | AATTCGGATA | TATTCAATAT |  |
| 64 | GGTTGAGAGC | GATGATCGAC |  |
| 65 | CAAGGCTCAT | TAGTGGAGTC |  |
| 66 | GAATGGAAGC | GCTAAACTTC |  |
| 67 | CTTCTATATG | TTTTGATTAA |  |
| 68 | TCTGGATTAC | ACTGTTTAGA |  |
| 69 | TTGATCAGTA | ATGAGTGATA |  |
| 70 | ATTTTTGTCG | CTATACCTCC |  |
| 71 | TACGACTGAA | TCTTGGCTCA |  |
| 72 | AAAGTTGCAA | CGACAGAATG |  |
| 73 | GGCGTGCTTT | CCTCCTGGAG |  |
| 74 | CGGCGGATTT | AGCATTTTCT |  |
| 75 | CGACAAAGTG | TACTAAGTAG |  |
| 76 | TGCGTAATTC | AGTTTAAGGA |  |
| 77 | CAAATGTCGT | AAACTGGCCT |  |
| 78 | CAGCTAGCTT | ATAGGTAGGG |  |
| 79 | ACACGGCTCT | TATCAGGGTC |  |
| 80 | ATTATGACTG | GAATGCGCAA |  |
| 81 | ACGCATAGAC | CACGGGTCAA |  |
| 82 | TGGAAGGACT | ATGGGTGCGC |  |
| 83 | TAAGTAGATA | CGGATACAAA |  |
| 84 | CACAAGTATA | TCGCCGGTTA |  |
| 85 | TAAGAATGCG | TAAATGTAAA |  |
| 86 | ATATGTGTGA | GCAGTGGAAG |  |
| 87 | ACACAGTGTG | CGAGTAGTCT |  |
| 88 | AGCACTGTAT | ATTTCTTCAA |  |
| 89 | ACTATGCGAG | TGTTTGATCC |  |
| 90 | CTACATGCTC | CGGGTCTATC |  |
| 91 | CTTCTGGTGG | CTGCGGGATG |  |
| 92 | GGATGCTCGA | GCGGTGCTCT |  |
| 93 | CAGCGAAGGA | GTAACGCAGA |  |
| 94 | GTAAAGACGT | TGATACAAAT |  |
| 95 | TTGCTACAAC | CCTAGGTCAC |  |
| 96 | TGGAAACGGT | TCTTTAGCGG |  |

## Supplementary References

1. Wang B, K.F., Hamoen LW Induction of the CtsR regulon improves Xylanase production in *Bacillus subtilis*. *Preprint from Research Square* (2023).
2. Ojo, O., Scott, D., Iwalokun, B., Odetoyin, B. & Grove, A. Transcriptome RNA Sequencing Data Set of Differential Gene Expression in *Escherichia coli* BW25113 Wild-Type and *slyA* Mutant Strains. *Microbiol Resour Announc* **10** (2021).
